## Index of Authors and Titles

- BOLTON, V. N. *See* HOWLETT, S. K.  
 BONNER, J. T., HAY, A., JOHN, D. G. *and* SUTHERS, H. B. pH affects fruiting and slug orientation in *Dictyostelium discoideum* 207  
 BROWN, S. *See* RASTAN, S.
- DANE, P. J. *and* TUCKER, J. B. Modulation of epidermal cell shaping and extracellular matrix during caudal fin morphogenesis in the Zebra fish *Brachydanio rerio* 145  
 DE FELICI, M. *and* SIRACUSA, G. Adhesiveness of mouse primordial germ cells to follicular and Sertoli cell monolayers 87  
 DE TERRA, N. Does the oral apparatus of the ciliate *Stentor* inhibit oral development by release of a diffusible substance? 241  
 DE TERRA, N. Cytoskeletal discontinuities in the cell body cortex initiate basal body assembly and oral development in the ciliate *Stentor* 249  
 DOETSCHMAN, T. C., EISTETTER, H., KATZ, M., SCHMIDT, W. *and* KEMLER, R. The *in vitro* development of blastocyst-derived embryonic stem cell lines: formation of visceral yolk sac, blood islands and myocardium 27
- EISEN, J. S. *See* GOVIND, C. K.  
 EISTETTER, H. *See* DOETSCHMAN, T. C.
- FEIZI, T. *See* RASTAN, S.  
 FESTING, M. F. W. *See* PONDER, B. A. J.  
 FISHER, C. *and* KOLLAR, E. J. Abnormal skin development in pupoid foetus (*pf/pf*) mutant mice 47
- GOOI, H. C. *See* RASTAN, S.  
 GOVIND, C. K., STEPHENS, P. J. *and* EISEN, J. S. Polyneuronal innervation of an adult and embryonic lobster muscle 13
- HABROVÁ, V. *See* PALEČEK, J.  
 HAY, A. *See* BONNER, J. T.  
 HONIG, L. S. *and* SUMMERBELL, D. Maps of strength of positional signalling activity in the developing chick wing bud 163  
 HORNBY, J. E. *See* STEPHENSON, D. A.  
 HOWLETT, S. K. *and* BOLTON, V. N. Sequence and regulation of morphological and molecular events during the first cell cycle of mouse embryogenesis 175
- IKEGAMI, S. *See* MITA-MIYAZAWA, I.  
 INGHAM, P. W. *See* MARTINEZ-ARIAS, A.
- JOHN, D. G. *See* BONNER, J. T.
- KALAIZIS, A. *See* ROWE, P. B.  
 KATZ, M. *See* DOETSCHMAN, T. C.  
 KEMLER, R. *See* DOETSCHMAN, T. C.  
 KOLLAR, E. J. *See* FISHER, C.
- LIM, L. *See* TUCKETT, F.

- MARTINEZ-ARIAS, A. *and* INGHAM, P. W. The origin of pattern duplications in segment polarity mutants of *Drosophila melanogaster* 129
- MARTINEZ-ARIAS, A. The development of *fused*<sup>-</sup> embryos of *Drosophila melanogaster* 99
- MITA-MIYAZAWA, I., IKEGAMA, S. *and* SATOH, N. Histospecific acetylcholinesterase development in the presumptive muscle cells isolated from 16-cell-stage ascidian embryos with respect to the number of DNA replications 1
- MORRIS-KAY, G. M. *See* TUCKETT, F.
- NEDVÍDEK, J. *See* PALEČEK, J.
- PALEČEK, J., HABROVÁ, V., NEDVÍDEK, J. *and* ROMANOVSKÝ, A. Dynamics of tubulin structures in *Xenopus laevis* oogenesis 75
- PONDER, B. A. J., FESTING, M. F. W. *and* WILKINSON, M. M. An allelic difference determines reciprocal patterns of expression of binding sites for *Dolichos biflorus* lectin in inbred strains of mice 229
- RASTAN, S., THORPE, S. J., SCUDDER, P., BROWN, S., GOOI, H. C. *and* FEIZI, T. Cell interactions in preimplantation embryos: evidence for involvement of saccharides of the poly-acetyllactosamine series 115
- ROMANOVSKÝ, A. *See* PALEČEK, J.
- ROWE, P. B. *and* KALAZIS, A. Serine metabolism in rat embryos undergoing organogenesis 137
- SATOH, N. *See* MITA-MIYAZAWA, I.
- SCHMIDT, W. *See* DOETSCHMAN, T. C.
- SCUDDER, P. *See* RASTAN, S.
- SIRACUSA, G. *See* DE FELICI, M.
- STEPHENS, P. J. *See* GOVIND, C. K.
- STEPHENSON, D. A. *and* HORNBY, J. E. Gene expression at the pink-eyed dilution (*p*) locus in the mouse is confirmed to be pigment cell autonomous using recombinant embryonic skin grafts 65
- SUMMERBELL, D. *See* HONIG, L. S.
- SUTHERS, H. B. *See* BONNER, J. T.
- THORPE, S. J. *See* RASTAN, S.
- TUCKER, J. B. *See* DANE, P. J.
- TUCKETT, F., LIM, L. *and* MORRIS-KAY, G. M. The ontogenesis of cranial neuromeres in the rat embryo I. A scanning electron microscope and kinetic study 215
- WILKINSON, M. M. *See* PONDER, B. A. J.
